# Supplementary material
Source: publisher site journal article supplement (http://www.kjim.org/upload/media/kjim-2020-240-suppl2.pdf)
Supplement: Supplementary file 1 [file kjim-2020-240-suppl2.pdf]

**Supplementary Table 2. Cox proportional hazard model of disease progression according to reduction of proteinuria after immunosuppressive therapy in subgroups divided by baseline proteinuria**

| Variable                                            | Model 1          |         | Model 2          |         | Model 3           |         |
|-----------------------------------------------------|------------------|---------|------------------|---------|-------------------|---------|
|                                                     | HR (95% CI)      | p value | HR (95% CI)      | p value | HR (95% CI)       | p value |
| Patients whose Pre-IS TAP $\geq$ 3.0 g/gCr (n = 34) |                  |         |                  |         |                   |         |
| Ter1                                                | 0.88 (0.25–3.08) | 0.846   | 0.83 (0.16–4.14) | 0.816   | 0.54 (0.09–3.05)  | 0.484   |
| Ter2                                                | 0.51 (0.11–2.46) | 0.403   | 0.51 (0.11–2.45) | 0.398   | 1.32 (0.16–11.18) | 0.796   |
| Ter3                                                | Reference        |         | Reference        |         | Reference         |         |
| Patients whose Pre-IS TAP < 3.0 g/gCr (n = 93)      |                  |         |                  |         |                   |         |
| Ter1                                                | 0.40 (0.12–1.29) | 0.125   | 0.32 (0.09–1.14) | 0.079   | 0.31 (0.08–1.16)  | 0.082   |
| Ter2                                                | 0.90 (0.43–1.87) | 0.769   | 0.98 (0.47–2.08) | 0.968   | 0.98 (0.47–2.05)  | 0.951   |
| Ter3                                                | Reference        |         | Reference        |         | Reference         |         |

Model 1: adjusted for age at start of immunosuppression, sex, time from biopsy to start of immunosuppressive therapy, and baseline estimated glomerular filtration rate (eGFR); Model 2: Model 2 + pre-IS TAP and time-averaged systolic blood pressure; Model 3: Model 3 + serum albumin, presence of endocapillary hypercellularity and use of renin-angiotensin system blocker at start of immunosuppressive therapy.

HR, hazard ratio; CI, confidence interval; pre-IS TAP, time-averaged proteinuria before the start of immunosuppressive therapy; Ter1, first tertile; Ter2, second tertile; Ter3, third tertile.

<sup>a</sup>Disease progression was defined as the occurrence of  $\geq$  30% decline in eGFR or end-stage renal disease.
